# Supplementary material for: Female genital cosmetic surgery: a cross-sectional survey exploring knowledge, attitude and practice of general practitioners
Source: PubMed Central journal article supplement — BMJ Open. 2016 Sep 26;6(9):e013010. doi: 10.1136/bmjopen-2016-013010 (PMC5051499; doi:10.1136/bmjopen-2016-013010), 2016-09-26
Supplement: bmjopen-2016-013010supp1.pdf [file bmjopen-2016-013010supp1.pdf]

**ONLINE SURVEY** (SUPPLEMENTARY FILE 1)

**FEMALE GENITAL COSMETIC SURGERY (FGCS)**

**HEALTH PROFESSIONAL QUESTIONNAIRE:**

1. AGE \_\_\_\_\_years
2. GENDER (Please circle): Male    Female    Indeterminate/Unspecified/Intersex
3. YEARS OF PRACTICE: \_\_\_\_\_years
4. HEALTHCARE PROFESSIONAL CATEGORY (tick all that apply)
  - GP
  - Obstetrician Gynaecologist
  - Nurse
  - Cosmetic Surgeon
  - Plastic Surgeon
  - Urologist
  - Allied Health Professional – describe: \_\_\_\_\_
  - Other \_\_\_\_\_

How long have you been practising in your role above?

In which country did you complete your professional degree? \_\_\_\_\_

5. LOCATION OF PRACTICE (tick all that apply)
  - Urban
  - Outer Metropolitan
  - Rural

In which state do you currently work in? \_\_\_\_\_

6. SPECIAL INTEREST IN: (tick all that apply)
  - Women's Health
  - Obstetrics and Gynaecology
  - Mental Health
  - Sexual Health
  - Cosmetic Medicine
  - Other \_\_\_\_\_

7. **FEMALE GENITAL COSMETIC SURGERY (FGCS):**  
**Knowledge and practice.** (please circle)

- i) Have you seen patients who have asked you about any form of FGCS?  
Yes / No  
Where have you acquired information about FGCS from? (tick all that apply)

- Media
- Conferences
- Other health professionals
- Consumer websites
- Other \_\_\_\_\_

- ii) "How confident do you feel to give advice for each of the following procedures"
- labiaplasty? Not confident/Reasonably confident/Very confident
  - clitoral hood reduction? Not confident/Reasonably confident/Very confident
  - perineoplasty?
  - hymenoplasty? Not confident/Reasonably confident/Very confident
  - orgasm shot ( O-shot) ? Not confident/Reasonably confident/Very confident
  - vaginal rejuvenation ? Not confident/Reasonably confident/Very confident
  - vulval liposuction? Not confident/Reasonably confident/Very confident
  - G spot augmentation Not confident/Reasonably confident/Very confident

- iii) How comfortable do you feel advising a woman who asks for FGCS?

- Not comfortable
- Comfortable
- Very comfortable

- v) How many patients do you see requesting FGCS?

\_\_\_\_\_ per week  
\_\_\_\_\_ per month  
\_\_\_\_\_ per year

- vi) Have you had any patients less than 18 years old asking you about FGCS? Yes / No

What is the age range of women asking you about FGCS?

- Not applicable. I haven't had any patients asking me about FGCS.

Youngest: \_\_\_\_\_ years

Oldest: \_\_\_\_\_ years

- vii) FGCS and risks of surgery

Do you know about the possible short term risks of FGCS?

- Not at all
- A little
- A lot

Do you know about the possible long term risks of FGCS?

- Not at all
- A little
- A lot

Do you talk about possible risks of FGCS for patients who request this?

- Not applicable. I haven't seen a patient asking for FGCS
- Only if they ask me
- Sometimes
- All the time

viii) Have you been asked for (tick all that apply):

- an examination?
- your opinion ?
- a referral?

ix) Do you examine these women's genital area ?

- Yes
- No
- Sometimes
- Not applicable (I haven't seen any patients asking about FGCS)

x) Do you offer / refer for counselling?

- Yes
- No
- Sometimes
- Not applicable (I haven't seen any patients asking about FGCS)

xi) Which specialist group have you referred women to for FGCS? (tick all that apply)

- Cosmetic Surgeon
- Plastic Surgeon
- Obstetrician Gynaecologist
- Urologist
- Psychologist / Psychiatrist
- Colleague for second opinion
- Women's health GP
- Not applicable (I haven't seen any patients asking about FGCS)

**8.. GENITAL APPEARANCE AND EDUCATION:**

i) Do you feel confident in assessing genital appearance?

Female anatomy

- Not confident
- Confident
- Very confident

Male anatomy

- Not Confident
- Confident

Very confident

ii) How much teaching regarding genital anatomy (both male and female) have you received in your medical training?

Female-

- none
- a little
- some
- a lot

Male –

- none
- a little
- some
- a lot

**9. INFORMATION TOOLS:**

Have you heard of the Labia Library(LL) website? Yes / No

Have you used or referred patients to L.L? Yes / No

Do you have other tools to assist you?

Describe them \_\_\_\_\_

**10. Please indicate what you think about Female Genital Cosmetic Surgery. (tick all that apply)**

- I have no opinion
- If a woman wants this it is her choice
- It should not be performed on women less than 18 years
- A woman should be counselled first
- It is acceptable for cosmetic reasons
- This surgery is unacceptable for cosmetic reasons
- It is no different to other types of cosmetic surgery

**11. What is your opinion of the role of GPs for FGCS?**

---

---

---

**12. Any final comments?**

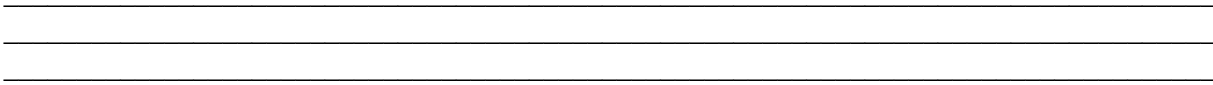

*Thank you for your contribution*
