# Supplementary material for: Female genital cosmetic surgery: a cross-sectional survey exploring knowledge, attitude and practice of general practitioners
Source: PubMed Central journal article supplement — BMJ Open. 2016 Sep 26;6(9):e013010. doi: 10.1136/bmjopen-2016-013010 (PMC5051499; doi:10.1136/bmjopen-2016-013010), 2016-09-26
Supplement: bmjopen-2016-013010supp2.pdf [file bmjopen-2016-013010supp2.pdf]

FEMALE GENITAL COSMETIC SURGERY (FGCS)  
HEALTH PROFESSIONAL QUESTIONNAIRE INFORMATION STATEMENT  
(Supplementary file 2)

**The aim:**

The aim of this survey is to explore the knowledge of Health Professionals with respect to Female Genital Cosmetic Surgery in Australia and how they manage these requests.

**What does the research involve?**

The questionnaire will take about 5 minutes to complete. Your completion of this questionnaire will contribute to this goal.

**Source of funding.**

No direct funding but we wish to acknowledge HealthEd for its provision of survey distribution and printing.

**Consenting to participate in the survey and withdrawing from the research.**

By signing up to complete the questionnaire, you will be indicating that you have read this explanatory statement and consent to participating in the survey. You have the right not to finish the survey, to skip any questions you prefer not to answer, or not submit the finished survey. However, once you submit the survey it will not be possible to withdraw your data because your answers are anonymous and the researchers will have no way of knowing what data are yours.

**Possible benefits and risks to participants**

The results of this survey will be used to improve the management of requests for Female Genital Cosmetic Surgery by health professionals, by improving health professionals' education guidelines and to thereby improve the health and wellbeing of women and girls in Australia. There are no reasonably foreseeable risks of harm from participation in this research. If you think that you will be upset or disturbed by questions about Female Genital Cosmetic Surgery you can choose not to participate. If you choose to proceed and find that the questions raise difficult topics for you, there is a list of services at the end of the survey that might assist you.

**Confidentiality and storage of data**

All information you give us will be completely anonymous. The name and address of anyone who answers these questions is not required. All data will be stored on a secure password-protected file on the Monash University system, accessible only to the researchers. All research data will be destroyed 5 years from the time results are published.

**Results**

A summary of the results will be made available in the form of a publication or a presentation as well as the websites of our research partners.

**Complaints**

If you have any complaints about any aspect of the project, the way it is being conducted or any questions about being a research participant in general, then you may contact: Emily Bingle, Office of Ethics and Research Governance, Alfred Hospital (+613 9076 3619)

*Thank you for your contribution, Magdalena Simonis.*

Results from this study will be made available upon request from the researchers. You can email the researchers directly at [magdalena.simonis@mac.com](mailto:magdalena.simonis@mac.com) and request to be sent the results via email when they are available. If you have any questions about the research project you can contact the researchers:

Name: Dr Magdalena Simonis  
Role: Researcher and Doctor  
Telephone: +613 9666 0600

Name: Dr Jason Ong  
Role: Researcher and Doctor  
Telephone: +613 9341 6265

Name: Dr Ramesh Manocha  
Role: Researcher and Doctor  
Telephone: +612 9747 0037

**If you are troubled by topics raised in the questionnaire, you could contact:**

**Your General Practitioner (GP)**

**Women's Health Victoria**

**Telephone: 03 9664 9300 [www.whv.org.au](http://www.whv.org.au)**

**Lifeline Telephone: 13 11 14 [www.lifeline.org.au](http://www.lifeline.org.au)**

**Mensline**

**Telephone: 1300 789 978 [www.menslineaus.org.au](http://www.menslineaus.org.au)**

**Jean Hailes for Women's Health Telephone: 1800 532 642 [www.jeanhailes.org.au](http://www.jeanhailes.org.au)**
